# Supplementary material
Source: HighWire-hosted journal article supplement (https://bmjopen.bmj.com/content/10/9/e035999)
Supplement: inline-supplementary-material-2 [file inline-supplementary-material-2.pdf]

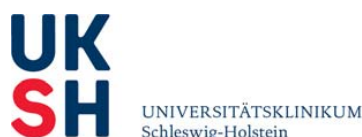

**Campus Kiel**  
→ **Klinik für Mund-, Kiefer- und Gesichtschirurgie**

**Ansprechpartnerin: Prof. Dr. K. Hertrampf**  
Arnold-Heller-Str. 3, Haus 26  
24105 Kiel  
Tel: 0431 500-26113  
E-Mail: hertrampf@mkg.uni-kiel.de

**Koordination:**  
**Frau Saskia Gabelmann**  
praxisHochschule, pHfG Trägergesellschaft mbH  
Neusser Str. 99, 50670 Köln  
Tel: 0221/5000330-64  
Email: s.gabelmann@praxishochschule.de

### **Einwilligungserklärung**

#### **(gesetzliche Betreuerinnen und Betreuer, Vorsorgebevollmächtigte)**

zur Studie „Mundgesundheitsverbesserung durch zahnärztlich delegierte, pflegebegleitende Remotivation und Reinstruktion“

Ich bin über die Inhalte der Studie und deren Ablauf ausreichend aufgeklärt worden.

Ich habe den Informationsbogen gelesen und verstanden. Ich hatte die Möglichkeit, Fragen zu stellen, und habe zufriedenstellende Antworten erhalten.

Ich erkläre, dass ich mit der im Rahmen der Studie erfolgenden Erhebung und Verarbeitung von Daten und ihrer verschlüsselten (pseudonymisierten) Weitergabe und Verwendung meines Angehörigen / Betreuten einverstanden bin und über meine Rechte angemessen informiert wurde.

Ich gebe meine Einwilligung, dass im Rahmen der Studie Studienmitarbeiter in die Bewohnerdokumentation meines Angehörigen / Betreuten Einsicht erhalten.

Ich willige ein, dass im Rahmen der Studie bei der Kassenzahnärztlichen Vereinigung Rheinland-Pfalz eine personenbezogene Abrechnungsdatenübermittlung (personenbezogene Datenanforderung und –auswertung) von meinem Angehörigen / Betreuten erfolgt.

Mir ist bewusst, dass die Ergebnisse dieser Studie in medizinischen Fachzeitschriften veröffentlicht werden, allerdings in anonymisierter Form, so dass ein direkter Bezug zu meinem Angehörigen / Betreuten nicht hergestellt werden kann.

Ich wurde darüber informiert, dass ich jederzeit Auskunft über die gespeicherten Daten und die Berichtigung von fehlerhaften Daten meines Angehörigen / Betreuten verlangen kann.

Sie haben jederzeit die Möglichkeit, Ihre Einwilligung ohne Angabe von Gründen zu widerrufen. Im Falle des Widerrufs findet keine weitere Datenübermittlung zwischen der

Universitätsklinikum  
Schleswig-Holstein  
Anstalt des  
öffentlichen Rechts

Vorstandsmitglieder:  
Prof. Dr. Jens Scholz (Vorsitzender)  
Peter Pansegrau  
Michael Kiens, MA  
Prof. Dr. Ulrich Stephani  
Prof. Dr. Thomas Münte  
Dr. med. Carsten Hilbert, MaHM

Bankverbindungen:  
Fördesparkasse Kiel  
IBAN: DE14 2105 0170 0000 1002 06  
SWIFT/BIC: NOLA DE 21 KIE  
Commerzbank AG  
IBAN: DE17 2308 0040 0300 0412 00  
SWIFT/BIC: DRES DE FF 230

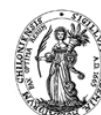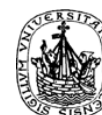

Studienleitung und der Arbeitsgruppe statt. Diese Widerrufserklärung richten Sie an die Studienleitung Frau Prof. Hertrampf. Ihr Widerruf gilt allerdings erst ab dem Zeitpunkt, zu dem Sie diesen aussprechen. Er hat keine Rückwirkung. Die Verarbeitung der Daten Ihres Angehörigen / Betreuten bis zu diesem Zeitpunkt bleibt rechtmäßig.

Ich habe das Informationsblatt und eine Einwilligungserklärung erhalten.

|                              |            |            |              |
|------------------------------|------------|------------|--------------|
| _____                        | _____      | _____      | _____        |
| Name, Vorname (Blockschrift) | Geb.-Datum | Ort, Datum | Unterschrift |

Gesetzlicher Betreuer/in

|                          |                              |            |              |
|--------------------------|------------------------------|------------|--------------|
| Vorsorgebevollmächtigte: | _____                        | _____      | _____        |
|                          | Name, Vorname (Blockschrift) | Ort, Datum | Unterschrift |

|                     |                              |            |              |
|---------------------|------------------------------|------------|--------------|
| Aufklärende Person: | _____                        | _____      | _____        |
|                     | Name, Vorname (Blockschrift) | Ort, Datum | Unterschrift |
